# Supplementary material
Source: publisher figshare collection journal article supplement (https://sage.figshare.com/ndownloader/files/12990752)
Supplement: Supplementary file 1 [file 12990752]

Video 1: Endoscopic view of Nasal Cavity/Nasopharynx in non-anatomic model demonstrating mucosal “stretch” during inspiration with obstructed nasal valve, suggesting a mechanism for the downstream modulation of nasal cavity volume by the nasal valve.
